# Supplementary material for: Microbiota Diversity of Festuca Sinensis Seeds in Different Location of Qinghai-Tibet Plateau
Source: Research Square preprint supplement (doi:10.21203/rs.3.rs-773691/v1), 2021-08-13
Supplement: Supplementary file 1 [file 3491ef7e331c8f92b9b680dc.xlsx]

## Sheet: Sheet1
FID		LAT	LON	Elevation_	200601	200602	200603	200604	200605	200606	200607	200608	200609	200610	200611	200612	200701	200702	200703	200704	200705	200706	200707	200708	200709	200710	200711	200712	200801	200802	200803	200804	200805	200806	200807	200808	200809	200810	200811	200812	200901	200902	200903	200904	200905	200906	200907	200908	200909
0	S32	36.5281	102.015	2589	-5.17	-2.14	2.29	7.89	12.86	16.41	19.57	19.26	12.41	8.57	1.51	-4.94	-7.23	-0.63	3.09	7.91	14.79	15.77	17.62	18.04	12.17	6.08	0.67	-4.41	-8.8	-6.93	4.39	9.09	14.11	15.77	18.5	16.13	12.95	7.76	0.56	-4.78	-6.16	0.04	3.07	10.72	12.58	16.7	18.65	16.04	13.43
1	S124	36.3464	102.071	2741	-5.52	-2.79	1.37	6.84	11.77	15.21	18.48	18.11	11.27	7.65	0.77	-5.23	-7.62	-1.15	2.13	6.74	13.6	14.54	16.48	16.83	11.05	5.05	0.04	-4.81	-9.43	-7.84	3.48	8.02	12.88	14.53	17.26	14.94	11.83	6.8	-0.22	-5.32	-6.52	-0.63	2.17	9.56	11.38	15.47	17.52	14.8	12.23
2	S116	37.3217	98.6622	2912	-10.79	-8.63	-7.5	-2.08	3.73	6.49	11.12	10.39	5.71	-1.03	-8.08	-13.39	-15.36	-10.82	-6.1	-0.57	5.73	5.97	9.14	10.31	4.29	-1.23	-7.85	-12.33	-14.68	-15.12	-6.25	-0.88	5	6.69	8.73	7.49	5.14	-1.29	-8.81	-11.95	-13.51	-9.08	-6.3	1.34	3.28	8.19	9.05	7.6	6.47
3	S22	37.3217	98.6622	2912	-10.79	-8.63	-7.5	-2.08	3.73	6.49	11.12	10.39	5.71	-1.03	-8.08	-13.39	-15.36	-10.82	-6.1	-0.57	5.73	5.97	9.14	10.31	4.29	-1.23	-7.85	-12.33	-14.68	-15.12	-6.25	-0.88	5	6.69	8.73	7.49	5.14	-1.29	-8.81	-11.95	-13.51	-9.08	-6.3	1.34	3.28	8.19	9.05	7.6	6.47
4	S57	36.4744	102.197	2994	-5.31	-2.49	2.06	7.79	12.71	16.39	19.41	19.11	12.23	8.56	1.47	-4.94	-7.32	-0.54	2.77	7.59	14.62	15.69	17.51	17.83	11.98	5.84	0.71	-4.48	-9.1	-7.2	4.27	8.86	13.9	15.73	18.42	15.99	12.77	7.63	0.39	-5.04	-6.3	-0.24	2.85	10.52	12.44	16.62	18.57	15.92	13.2
5	S99	36.2997	102.202	3060	-6.5	-4.28	-0.44	4.91	9.75	13.12	16.5	16.06	9.34	5.96	-0.76	-6.3	-8.79	-2.48	0.29	4.67	11.53	12.43	14.46	14.77	9.14	3.27	-1.3	-5.96	-10.7	-9.53	1.68	6.04	10.75	12.42	15.17	12.92	9.93	5.08	-1.79	-6.56	-7.64	-2.05	0.39	7.53	9.32	13.34	15.52	12.76	10.3
6	S41	36.3392	102.159	3129	-5.5	-2.83	1.43	6.99	11.89	15.4	18.6	18.22	11.36	7.82	0.89	-5.15	-7.57	-0.97	2.15	6.78	13.71	14.7	16.61	16.92	11.13	5.1	0.2	-4.74	-9.47	-7.82	3.6	8.09	12.98	14.71	17.41	15.06	11.91	6.9	-0.16	-5.33	-6.48	-0.64	2.23	9.65	11.51	15.65	17.68	14.92	12.29
7	S52	35.7767	94.0847	4617	-10.59	-8.06	-8.66	-2.97	2.5	5.85	10.17	9.16	4.81	-2.03	-9.12	-13.47	-15.55	-11.89	-6.81	-1.43	3.44	4.63	8.47	9.01	3.78	-2.76	-9.43	-13.23	-14.75	-15.01	-7.77	-2.71	3.5	6.04	8.34	6.5	3.96	-2.97	-9.94	-11.84	-13.16	-10.59	-6.98	-0.47	1.75	6.78	8.55	7.32	5.09
8	S66	35.7767	94.0847	4617	-10.59	-8.06	-8.66	-2.97	2.5	5.85	10.17	9.16	4.81	-2.03	-9.12	-13.47	-15.55	-11.89	-6.81	-1.43	3.44	4.63	8.47	9.01	3.78	-2.76	-9.43	-13.23	-14.75	-15.01	-7.77	-2.71	3.5	6.04	8.34	6.5	3.96	-2.97	-9.94	-11.84	-13.16	-10.59	-6.98	-0.47	1.75	6.78	8.55	7.32	5.09
9	S8	32.9683	92.01	5197	-9.78	-8.57	-8.71	-4.66	0.27	5.34	8.02	6.9	3.22	-4.18	-10.18	-12.68	-13.8	-13.53	-7.88	-3.4	1.57	3.58	6.32	6.84	3.35	-1.1	-12.04	-13.01	-12.34	-14.28	-9.02	-3.93	0.83	4.03	5.97	5.12	2.44	-4.49	-10.71	-12.43	-12.22	-10.51	-7.83	-2.14	-0.59	5.08	7.21	5.78	3.92
10	S85	29.9847	93.2069	3534	-2.71	-0.92	-0.34	2.02	5.68	10.22	11.48	10.71	8.44	2.87	-1.92	-5.01	-4.87	-5.39	-0.42	2.74	7.94	8.78	10.69	10.76	8.4	5.97	-1.19	-4.68	-4.08	-6.06	-1.21	2.99	6.68	9.15	10.49	9.43	8.33	2.99	-3.01	-4.53	-5.04	-2.78	-0.86	3.9	6.46	10.71	12.08	10.23	9.1
11	S261	29.9256	92.1172	4003	-0.49	1.72	2.79	4.92	8.92	13.91	14.42	13.51	11.06	5.25	0.41	-2.47	-1.73	-2.41	3.08	5.6	11.66	12.4	13.82	13.34	11.1	8.57	0.54	-2.52	-1.42	-2.35	1.8	6.37	9.86	12.29	13.08	11.92	11	5.58	0.1	-2.22	-2.4	0.16	2.32	7.42	10.11	14.62	15.24	12.91	11.78
12	S3	31.3442	92.0444	4542	-6.13	-4.22	-3.06	0.61	5.42	11.01	12.34	11.46	8.11	0.78	-4.72	-8.35	-8.46	-8.48	-2.5	1.85	7.83	9.66	11.4	11.19	8.49	4.7	-7.57	-8.58	-7.3	-9.15	-3.38	1.89	6.21	9.42	10.92	10.08	7.4	0.84	-6.1	-8.37	-8.2	-5.88	-2.87	3.26	5.48	10.99	12.54	10.64	8.57
13	S284	29.9233	92.1003	4897	-0.49	1.72	2.79	4.92	8.92	13.91	14.42	13.51	11.06	5.25	0.41	-2.47	-1.73	-2.41	3.08	5.6	11.66	12.4	13.82	13.34	11.1	8.57	0.54	-2.52	-1.42	-2.35	1.8	6.37	9.86	12.29	13.08	11.92	11	5.58	0.1	-2.22	-2.4	0.16	2.32	7.42	10.11	14.62	15.24	12.91	11.78
					MMT
[truncated: 215 more columns]
